# Supplementary material for: Synthesis and evaluation in rats of homologous series of [18F]-labeled dopamine D2/3 receptor agonists based on the 2-aminomethylchroman scaffold as potential PET tracers
Source: Springer Nature journal article supplement (doi:10.1186/s13550-015-0119-x), 2015-07-24
Supplement: MOESM1 [file 9786382]

**SYNTHESIS AND EVALUATION IN RATS OF HOMOLOGOUS SERIES OF [<sup>18</sup>F]-  
LABELED DOPAMINE D<sub>2/3</sub> RECEPTOR AGONISTS BASED ON THE 2-  
AMINOMETHYLCHROMAN SCAFFOLD AS POTENTIAL PET TRACERS**

**SUPPLEMENTARY MATERIAL**

Vladimir Shalgunov<sup>1</sup>, Jan-Peter van Wieringen<sup>2</sup>, Henk M. Janssen<sup>3</sup>, P. Michel Franssen<sup>3</sup>, Rudi A.J.O. Dierckx<sup>1</sup>,  
Martin C. Michel<sup>4</sup>, Jan Booij<sup>2</sup>, Philip H. Elsinga<sup>1\*</sup>

<sup>1</sup>Department of Nuclear Medicine and Molecular Imaging, University Medical Center Groningen, University of Groningen, Groningen, The Netherlands

<sup>2</sup>Department of Nuclear Medicine, Academic Medical Center, University of Amsterdam, Amsterdam, The Netherlands

<sup>3</sup>SyMO-Chem BV, Eindhoven, The Netherlands

<sup>4</sup>Department of Pharmacology, Johannes Gutenberg University, Mainz, Germany

\*Corresponding author:

Prof. Dr. Philip H. Elsinga

Department of Nuclear Medicine and Molecular Imaging

University Medical Center Groningen

University of Groningen

Hanzeplein 1

9713 GZ Groningen, the Netherlands

phone: +31-50-361-32-47

fax: +31-50-361-16-87

email: p.h.elsinga@umcg.nl

## LIST OF ABBREVIATIONS

- 1TCM – one-tissue compartment model
- 2TCM – two-tissue compartment model
- BP<sub>ND</sub> – binding potential non-displaceable (equilibrium concentration ratio of specifically bound radioligand to non-displaceable radioligand in tissue)<sup>1</sup>
- DMF – N,N'-dimethylformamide
- ESI-MS – electron-spray ionization mass-spectrometry
- GPCR – G-protein coupled receptor
- GTP – guanosinetriphosphate
- HPLC – high-pressure liquid chromatography
- LC – liquid chromatography
- MS/MS – tandem mass spectrometry
- PET – positron emission tomography
- ROI – region of interest
- SPECT – single photon emission computed tomography
- SRTM – simplified reference-tissue model
- SUV – standardized uptake value (regional uptake relative to mean uptake across the body)
- TAC – time-activity curve
- TLC – thin-layer chromatography
- UV-VIS – ultraviolet/visible
- V<sub>T</sub> – total distribution volume of a radioligand in the tissue (i.e. the sum of distribution volumes of free, non-specifically and specifically bound radioligand)



**SUPPLEMENTAL FIGURES**

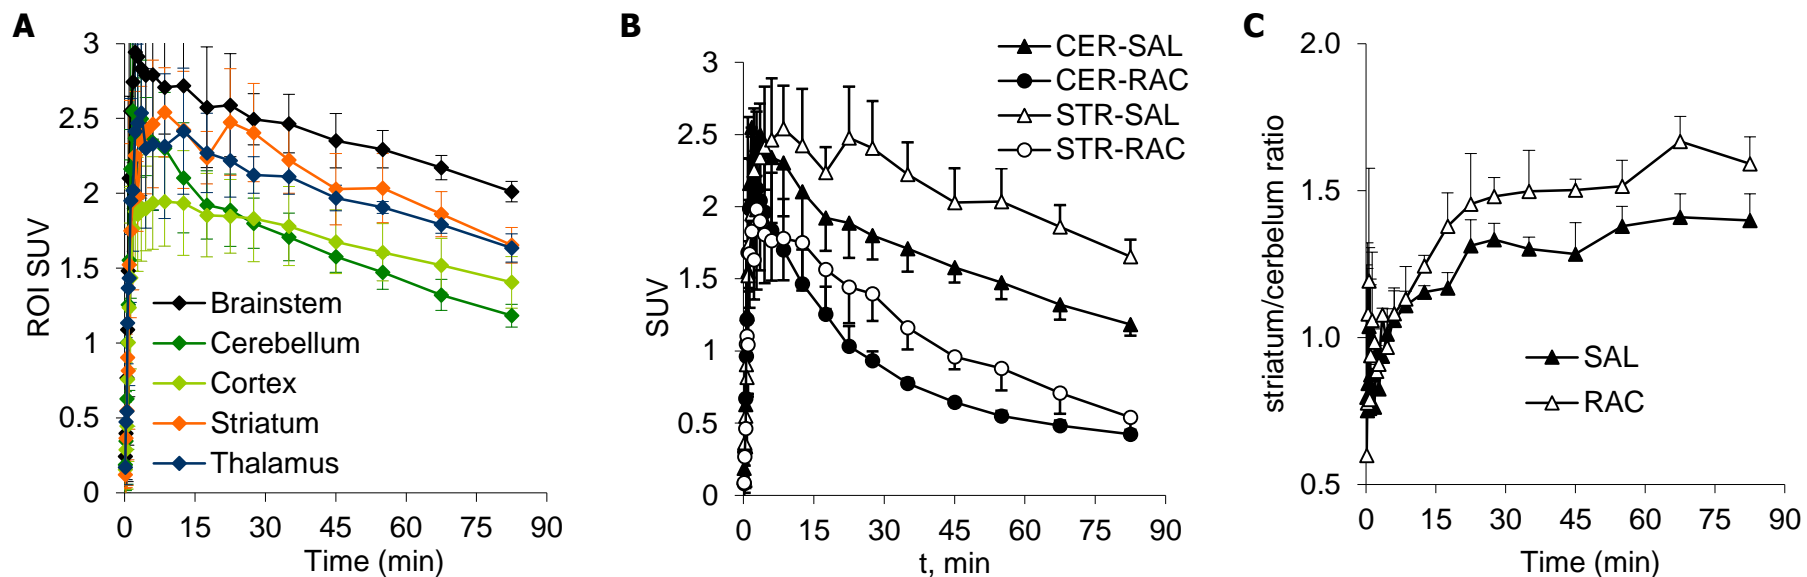

**Supplemental Figure 1.** Brain uptake (means±SD) of [<sup>18</sup>F]FBu-AMC13 in rat brain. A – time-activity curves (TACs) per region-of-interest (ROI) in control (saline-treated) rats. B – cerebellar (CER) and striatal (STR) TACs of in saline-treated (SAL) and raclopride-treated (RAC) rats. C – striatum-to-cerebellum uptake ratios in saline-treated and raclopride-treated rats.

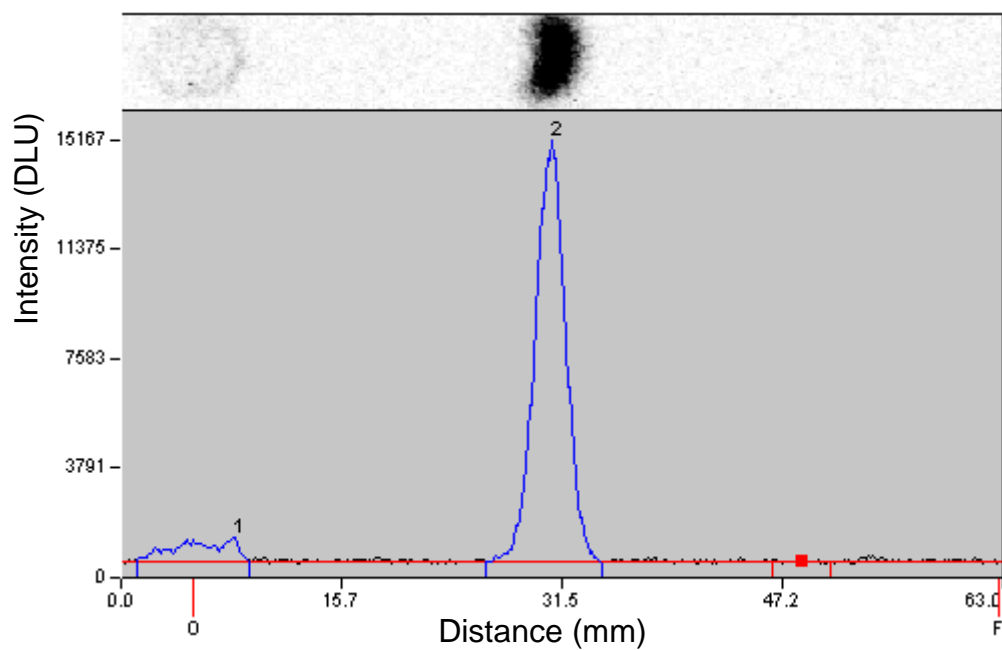

**Supplemental Figure 2.** Representative TLC of radioactivity extracted from the brain of a rat injected with [ $^{18}\text{F}$ ]FET-AMC13.

Peak 1 corresponds to radiometabolites remaining on the start. Peak 2 corresponds to intact [ $^{18}\text{F}$ ]FET-AMC13. Eluent is ethylacetate/methanol/triethylamine 100/5/1.

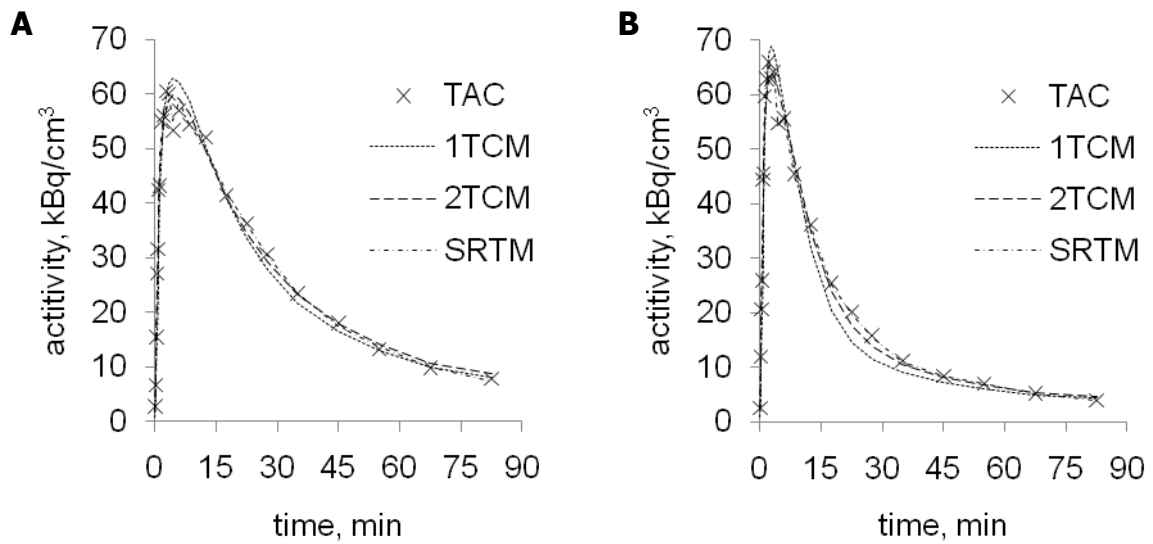

**Supplemental Figure 3.** Representative striatal (A) and cerebellar (B) TACs of [<sup>18</sup>F]FET-AMC13 for a control rat and the corresponding fits with 1TCM, 2TCM and SRTM models.

2TCM fits were better than 1TCM fits in 69 out of 70 (99%) cases, as assessed by Akaike's information criterion (AIC). SRTM fits had lower AIC value than 2TCM fits in 44 out of 70 (63%) cases.

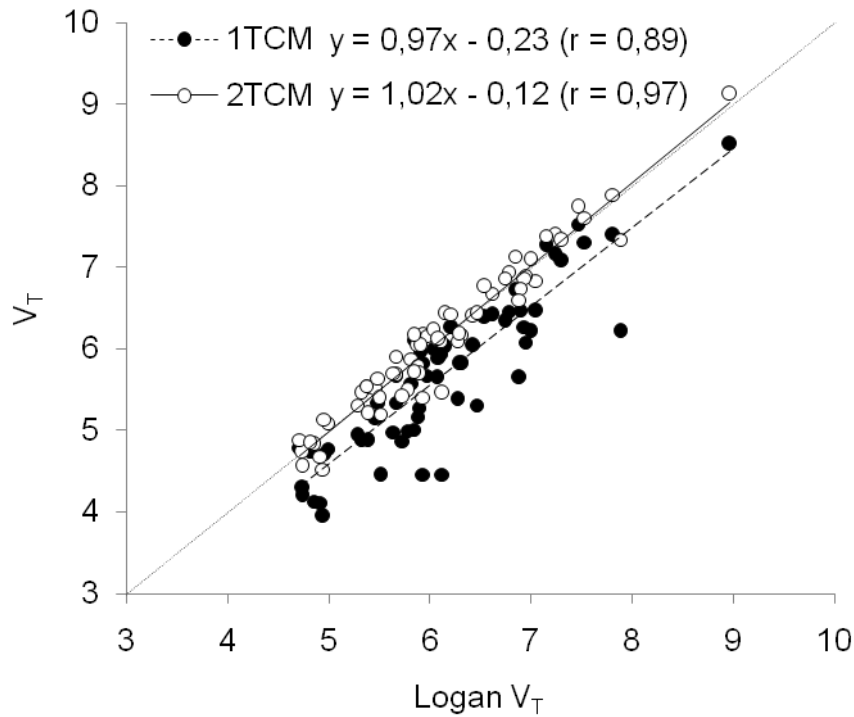

**Supplemental Figure 4.** Correlation of region-of-interest total distribution volumes ( $V_T$ ) of [ $^{18}\text{F}$ ]FET-AMC13 obtained by Logan analysis with  $V_T$  values obtained by analyses with 1TCM and 2TCM models. Linear regression lines along with their equations and  $r$  and  $p$  values and the unity line ( $x=y$ ) are shown on the graphs.

Points represent fits for individual regions in individual animals (both control and raclopride-pre-treated). Data for striatum, hippocampus, thalamus, hypothalamus, cortex, brainstem, cerebellum, olfactory bulbs and pituitary are used.

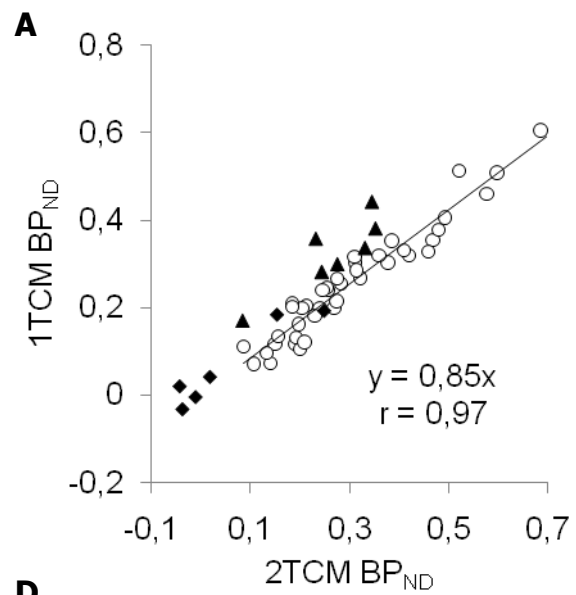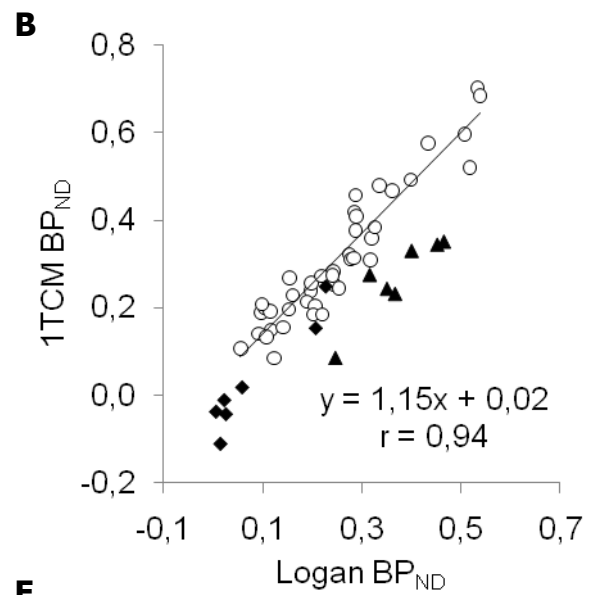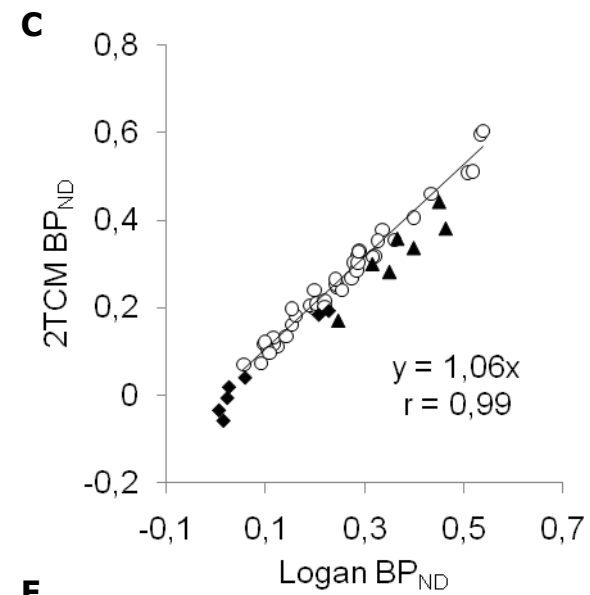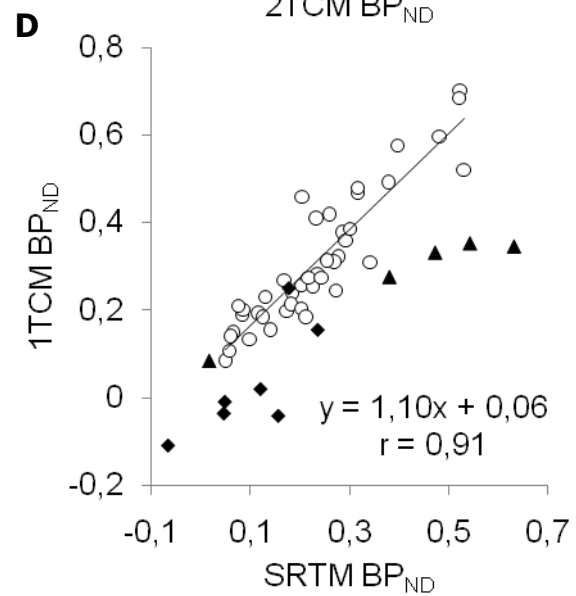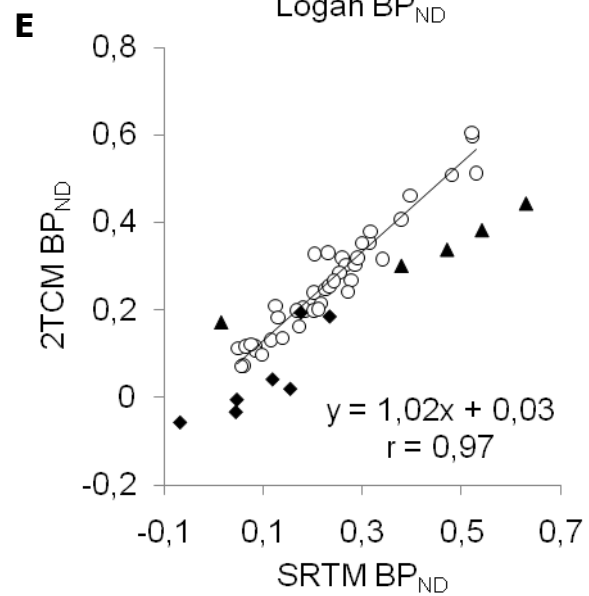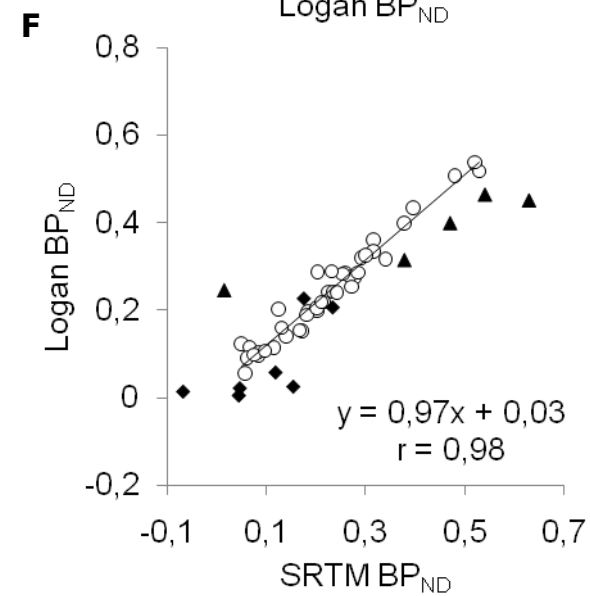



**Supplemental Figure 5.** Mutual correlation of region-of-interest binding potential ( $BP_{ND}$ ) values of [ $^{18}F$ ]FET-AMC13 obtained from different models. A – correlation of 1TCM and 2TCM  $BP_{ND}$  values; B,C – correlation of Logan-derived values with 1TCM and 2TCM-derived data; D,E,F – correlation of SRTM-derived values 1TCM, 2TCM and Logan-derived data. Linear regression lines, along with their equations and r and p values are shown on the graphs.

Points represent fits for individual regions in individual animals (both control and raclopride-pre-treated). Data for the striatum, hippocampus, thalamus, hypothalamus, cortex and brainstem are given as white circles. Data for the olfactory bulbs and pituitary are given as black diamonds and black triangles, respectively. These data are not used for the building of the linear regression lines shown on the graphs.  $BP_{ND}$  values are calculated using the cerebellum as a reference region, therefore the data for the cerebellum are not presented.  $V_T$ -based  $BP_{ND}$  values are used in case of 2TCM.

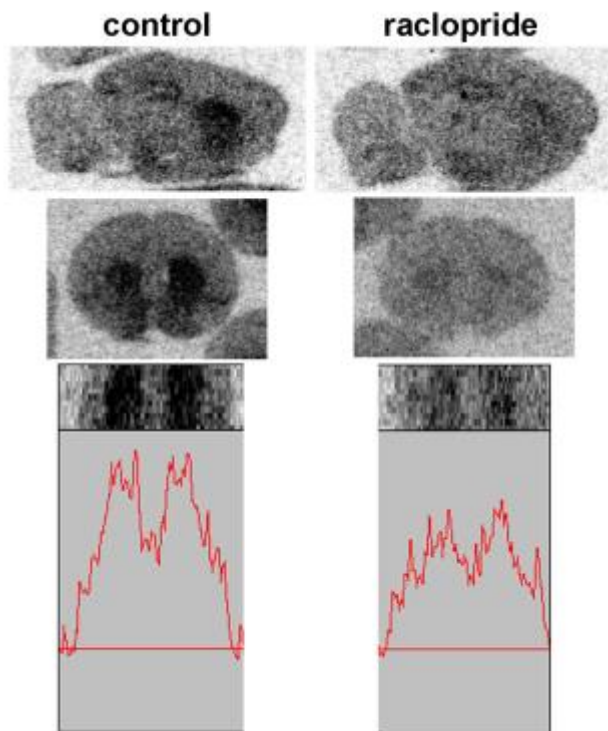

**Supplemental Figure 6.** Ex vivo autoradiography images of [ $^{18}\text{F}$ ]FET-AMC13 from control (left) and raclopride-treated (right) rats. Representative sagittal and coronal slices (top) and a profile section through the coronal slices showing absolute exposure values (bottom).

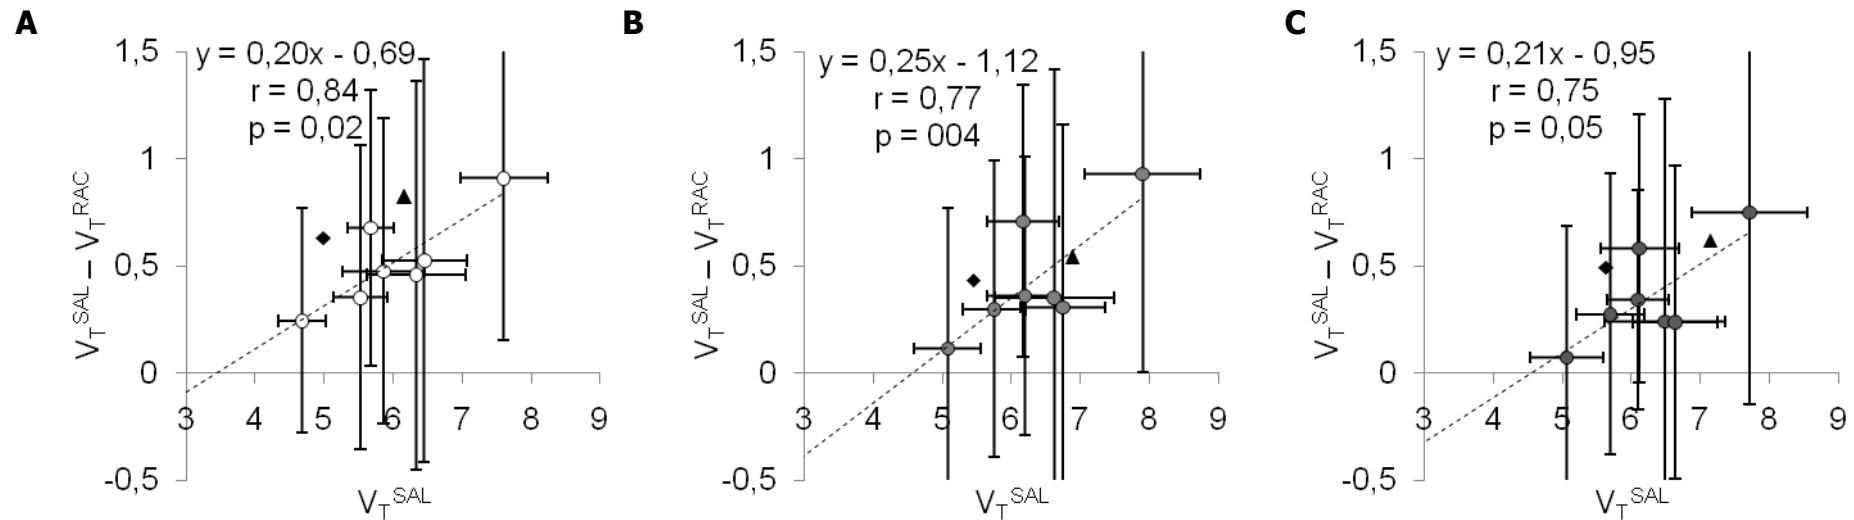

**Supplemental Figure 7.** Modified Lassen plots<sup>2</sup> for [<sup>18</sup>F]FET-AMC13 built from 1TCM (A), 2TCM (B) and Logan (C) data.

$V_T^{SAL}$  –ROI distribution volume in the control group;  $V_T^{RAC}$  –ROI distribution volume in the raclopride-treated group. Assuming equal receptor occupancy by raclopride and equal non-displaceable volume of distribution ( $V_{ND}$ ) of the tracer in all ROIs, the slope of the linear regression line represents the fraction of receptors occupied by raclopride, while the X-intersect represents  $V_{ND}$ .

Points show mean values, error bars show standard deviations. Data for striatum (always the rightmost topmost circle), hippocampus, thalamus, hypothalamus, cortex, brainstem and cerebellum (always the leftmost bottommost circle) are presented. Data for the olfactory bulbs and pituitary are given without error bars as, respectively, black diamonds and black triangles, and are not used for the building of the linear regression lines. Equations and r and p values of linear regression are shown on the graphs. Fits were performed disregarding the variability of the means.

## SUPPLEMENTAL TABLES

**Supplemental Table 1.** Radio-HPLC and radio-TLC characterization data for [<sup>18</sup>F]AMC13 and [<sup>18</sup>F]AMC15 homologues.

| Compound                    | QC1 k'            | QC2 k'            | TLC R <sub>f</sub> |
|-----------------------------|-------------------|-------------------|--------------------|
| [ <sup>18</sup> F]FEt-AMC13 | 12.3 <sup>*</sup> | 2.1 <sup>‡</sup>  | 0.40 <sup>  </sup> |
| [ <sup>18</sup> F]FPr-AMC13 | 12.9 <sup>*</sup> | 4.0 <sup>‡</sup>  | 0.46 <sup>  </sup> |
| [ <sup>18</sup> F]FBu-AMC13 | 12.9 <sup>*</sup> | 5.9 <sup>‡</sup>  | 0.56 <sup>  </sup> |
| [ <sup>18</sup> F]FEt-AMC15 | 9.1 <sup>†</sup>  | 7.1 <sup>§</sup>  | 0.16 <sup>¶</sup>  |
| [ <sup>18</sup> F]FPr-AMC15 | 9.8 <sup>†</sup>  | 9.5 <sup>§</sup>  | 0.22 <sup>¶</sup>  |
| [ <sup>18</sup> F]FBu-AMC15 | 12.2 <sup>†</sup> | 12.3 <sup>§</sup> | 0.50 <sup>¶</sup>  |

<sup>\*</sup>Platinum C18 EPS 100A 5 µm, 250x5 mm; acetonitrile/water/formic acid 55/45/0.1; 2

ml/min

<sup>†</sup>Platinum C18 EPS 100A 5 µm, 250x5 mm; acetonitrile/10 mM NaH<sub>2</sub>PO<sub>4</sub> pH7.0 70/30; 2

ml/min

<sup>‡</sup>Gracesmart5 µm, 250x5 mm;acetonitrile/10 mM H<sub>3</sub>PO<sub>4</sub> 25/75, 2 ml/min

<sup>§</sup>Gracesmart5 µm, 250x5 mm;acetonitrile/10 mM NaH<sub>2</sub>PO<sub>4</sub>pH7.0 40/60, 2 ml/min

<sup>||</sup>ethylacetate/methanol/triethylamine 100/5/1, silica plates

<sup>¶</sup>ethylacetate/methanol/ammonia/triethylamine 100/5/5/1, silica plates

**Supplemental Table 2.** MS/MS transitions and LC retention times of [<sup>18</sup>F]AMC13 and [<sup>18</sup>F]AMC15 homologues.

| Compound  | Precursor<br>calcd M / formula                                            | m/z<br>[M+H] <sup>+</sup> | Monitored transition products <sup>a</sup><br>calcd M / formula     | m/z M <sup>+</sup> | retention<br>time,<br>min |
|-----------|---------------------------------------------------------------------------|---------------------------|---------------------------------------------------------------------|--------------------|---------------------------|
| FEt-AMC13 | 331.16<br>C <sub>19</sub> H <sub>22</sub> FNO <sub>3</sub>                | 332.20                    | 153.07 C <sub>9</sub> H <sub>10</sub> FO <sup>+</sup>               | 153.10             | 6.27                      |
|           |                                                                           |                           | 107.05 C <sub>7</sub> H <sub>7</sub> O <sup>+</sup>                 | 107.10             |                           |
| FPr-AMC13 | 345.17<br>C <sub>20</sub> H <sub>24</sub> FNO <sub>3</sub>                | 346.20                    | 167.09 C <sub>10</sub> H <sub>12</sub> FO <sup>+</sup>              | 167.10             | 7.07                      |
|           |                                                                           |                           | 107.05 C <sub>7</sub> H <sub>7</sub> O <sup>+</sup>                 | 107.10             |                           |
| FBu-AMC13 | 359.19<br>C <sub>21</sub> H <sub>26</sub> FNO <sub>3</sub>                | 360.20                    | 181.10 C <sub>11</sub> H <sub>14</sub> FO <sup>+</sup>              | 181.10             | 8.17                      |
|           |                                                                           |                           | 107.05 C <sub>7</sub> H <sub>7</sub> O <sup>+</sup>                 | 107.10             |                           |
| FEt-AMC15 | 429.24<br>C <sub>24</sub> H <sub>32</sub> N <sub>3</sub> O <sub>3</sub> F | 430.30                    | 206.12 C <sub>12</sub> H <sub>16</sub> NO <sub>2</sub> <sup>+</sup> | 206.20             | 4.62                      |
| FPr-AMC15 | 443.26<br>C <sub>25</sub> H <sub>34</sub> FN <sub>3</sub> O <sub>3</sub>  | 444.30                    | 206.12 C <sub>12</sub> H <sub>16</sub> NO <sub>2</sub> <sup>+</sup> | 206.20             | 5.87                      |
| FBu-AMC15 | 457.27<br>C <sub>26</sub> H <sub>36</sub> FN <sub>3</sub> O <sub>3</sub>  | 458.30                    | 206.12 C <sub>12</sub> H <sub>16</sub> NO <sub>2</sub> <sup>+</sup> | 206.20             | 6.11                      |

<sup>a</sup>Putative fragmentation reactions are as follows:

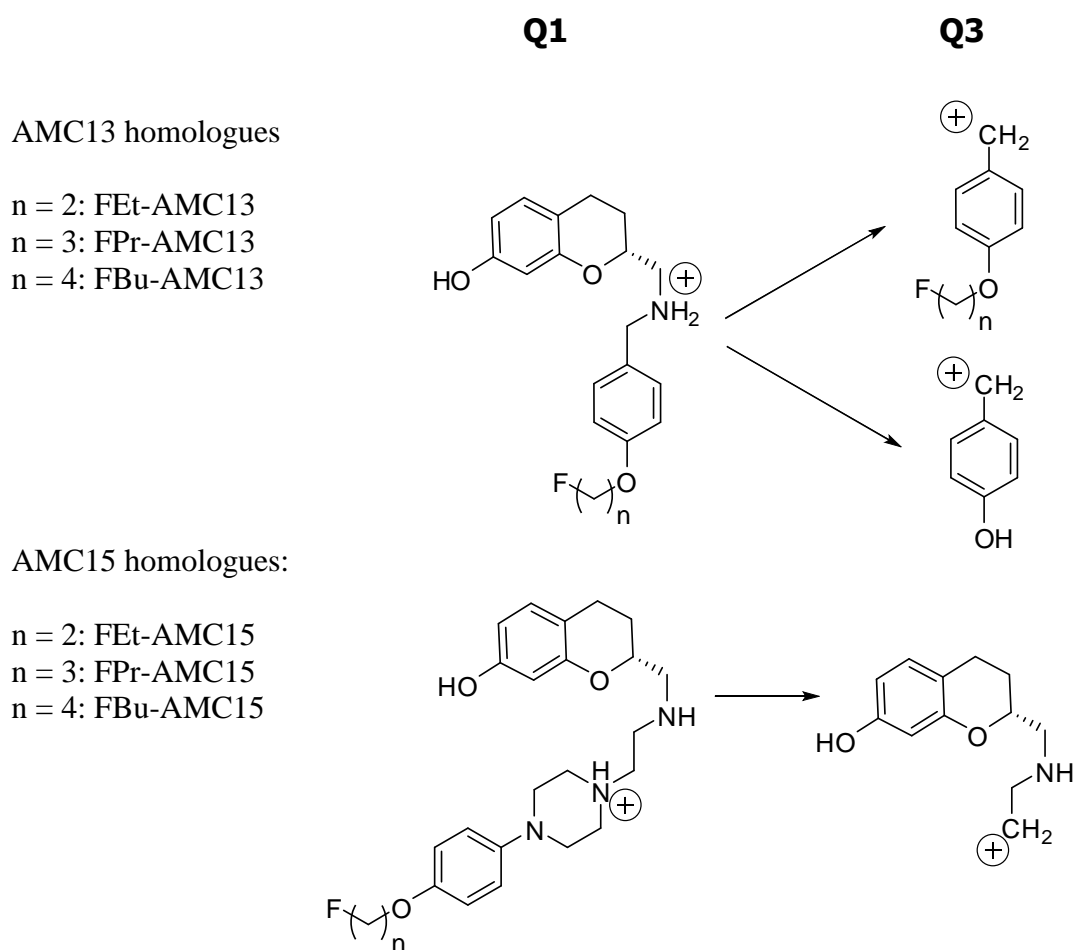

**Supplemental Table 3.** *Ex vivo* uptake(SUV) of the evaluated tracers in the peripheral tissues of saline (SAL) and raclopride-pre-treated (RAC) rats.

| Tracer                   | Treatment | <sup>[18F]</sup> FEt-AMC13 |              | <sup>[18F]</sup> FBu-AMC13 |              | <sup>[18F]</sup> FEt-AMC15 |              |
|--------------------------|-----------|----------------------------|--------------|----------------------------|--------------|----------------------------|--------------|
|                          |           | SAL<br>(n=4)               | RAC<br>(n=4) | SAL<br>(n=3)               | RAC<br>(n=3) | SAL<br>(n=3)               | RAC<br>(n=3) |
| Whole blood              |           | 0.16±0.03                  | 0.17±0.01    | ND*                        | ND           | 0.06±0.03                  | 0.12±0.08    |
| Blood cells <sup>†</sup> |           | 0.07±0.01                  | 0.06±0.01    | ND                         | ND           | 0.05±0.04                  | 0.05±0.04    |
| Plasma <sup>†</sup>      |           | 0.22±0.04                  | 0.23±0.01    | 0.15±0.02                  | 0.16±0.03    | 0.14±0.11                  | 0.07±0.02    |
| Adipose tissue           |           | 0.30±0.42                  | 0.09±0.02    | ND                         | ND           | 0.18±0.09                  | 0.10±0.05    |
| Adrenal glands           |           | 0.84±0.29                  | 0.59±0.20    | 34.5±3.5                   | 32.1±3.6     | 1.53±0.58                  | 1.73±1.07    |
| Bladder                  |           | 1.00±0.52                  | 0.83±0.64    | 0.43±0.16                  | 0.59±0.26    | 0.23±0.05                  | 0.69±0.30    |
| Bone                     |           | 0.24±0.21                  | 0.17±0.05    | 0.73±0.47                  | 0.77±0.46    | 0.14±0.03                  | 0.12±0.08    |
| Bone marrow              |           | 0.68±0.38                  | 2.00±3.17    | 2.31±1.19                  | 2.18±0.09    | 0.98±0.36                  | 0.91±0.53    |
| Caecum                   |           | 0.46±0.29                  | 0.63±0.84    | ND                         | ND           | 0.15±0.10                  | 0.91±1.10    |
| Duodenum                 |           | 1.15±0.25                  | 4.01±4.63    | 3.24±1.2                   | 2.70±1.37    | 1.92±0.35                  | 22.8±36.6    |
| Heart                    |           | 0.15±0.04                  | 0.16±0.02    | 0.50±0.25                  | 0.36±0.03    | 0.11±0.04                  | 0.15±0.10    |
| Kidney                   |           | 0.64±0.20                  | 0.48±0.07    | 3.24±0.69                  | 2.36±0.54    | 0.40±0.10                  | 0.61±0.51    |
| Large intestine          |           | 0.57±0.36                  | 0.41±0.33    | 0.60±0.13                  | 0.46±0.19    | 0.15±0.07                  | 1.20±1.48    |
| Large intestine content  |           | 0.06±0.03                  | 0.09±0.12    | ND                         | ND           | 0.02±0.01                  | 0.06±0.04    |
| Liver                    |           | 1.51±0.14                  | 1.43±0.30    | 1.49±0.15                  | 1.99±0.86    | 0.86±0.23                  | 1.47±1.56    |
| Lung                     |           | 1.67±0.41                  | 1.38±0.20    | 4.85±2.15                  | 4.26±1.02    | 1.18±0.16                  | 1.19±0.40    |
| Muscle                   |           | 0.17±0.04                  | 0.19±0.05    | 0.33±0.13                  | 0.27±0.02    | 0.07±0.04                  | 0.15±0.11    |
| Pancreas                 |           | 1.31±0.31                  | 1.47±0.32    | 3.78±0.41                  | 3.54±0.64    | 0.75±0.27                  | 0.92±0.77    |
| Prostate                 |           | 0.62±0.18                  | 0.40±0.26    | 0.95±0.17                  | 1.27±0.40    | 0.38±0.15                  | 0.42±0.10    |
| Small intestine          |           | 3.15±2.00                  | 2.39±1.94    | 4.52±5.94                  | 3.21±3.67    | 0.18±0.07                  | 11.1±18.4    |
| Small intestine content  |           | 54.2±57.7                  | 24.6±32.8    | 20.9±31.4                  | 11.0±11.4    | 0.56±0.24                  | 60.5±104     |
| Spleen                   |           | 0.46±0.05                  | 0.52±0.10    | 2.48±1.27                  | 2.14±0.20    | 1.52±0.68                  | 1.62±1.15    |
| Stomach                  |           | 1.36±0.35                  | 2.09±1.19    | 1.90±0.26                  | 2.19±0.67    | 1.79±0.92                  | 1.73±0.75    |
| Submandibular gland      |           | 0.36±0.12                  | 0.28±0.06    | 2.01±0.53                  | 2.12±0.85    | 1.51±0.26                  | 1.41±0.34    |
| Testes                   |           | 0.40±0.06                  | 0.42±0.10    | ND                         | ND           | 0.04±0.01                  | 0.04±0.01    |
| Thymus                   |           | 0.32±0.06                  | 0.30±0.06    | 2.04±0.27                  | 1.54±0.12    | 0.49±0.09                  | 0.43±0.15    |
| Urine                    |           | 11.0±9.5                   | 4.40±3.88    | 0.63±0.53                  | 1.51±0.95    | 0.69±0.33                  | 2.32±3.35    |

Data are presented as means±SD \* Not determined <sup>†</sup>Plasma and cell fractions were obtained from whole blood by short centrifugation (3500 g, 5

min)

**Supplemental Table 4.** 1TCM and 2TCM rate constant estimates of [<sup>18</sup>F]FET-AMC13 uptake in brain regions of control rats.

| ROI          | Rat | 1TCM                         |                        |     | 2TCM                         |                        |                        |                        |     |
|--------------|-----|------------------------------|------------------------|-----|------------------------------|------------------------|------------------------|------------------------|-----|
|              |     | K <sub>1</sub><br>(ml/g/min) | k <sub>2</sub> (1/min) | AIC | K <sub>1</sub><br>(ml/g/min) | k <sub>2</sub> (1/min) | k <sub>3</sub> (1/min) | k <sub>4</sub> (1/min) | AIC |
| Striatum     | A   | 0.45±0.03                    | 0.05±0.01              | 489 | 1.77±0.62                    | 4.95±3.00              | 1.34±0.29              | 0.05±0.01              | 449 |
|              | B   | 0.49±0.02                    | 0.06±0.01              | 472 | 0.63±0.14                    | 0.48±0.68              | 0.81±1.13              | 0.17±0.07              | 471 |
|              | C   | 0.47±0.02                    | 0.07±0.004             | 456 | 0.98±0.85                    | 3.47±8.55              | 2.81±3.01              | 0.11±0.08              | 454 |
|              | D   | 0.51±0.02                    | 0.07±0.01              | 465 | 8.06±30.34                   | 58.0±203.8             | 3.54±188.40            | 0.07±263.98            | 433 |
| Hippocampus  | A   | 0.41±0.02                    | 0.06±0.01              | 483 | 2.21±1.25                    | 8.56±3.62              | 1.60±2.24              | 0.05±8.88              | 443 |
|              | B   | 0.51±0.02                    | 0.08±0.01              | 466 | 0.71±0.07                    | 0.50±0.23              | 0.50±0.27              | 0.14±0.03              | 449 |
|              | C   | 0.46±0.01                    | 0.08±0.004             | 441 | 0.60±0.12                    | 0.57±0.77              | 1.17±1.34              | 0.24±0.09              | 438 |
|              | D   | 0.48±0.02                    | 0.08±0.01              | 455 | 101±14615                    | 1246±181990            | 5.49±4.23              | 0.07±0.05              | 441 |
| Thalamus     | A   | 0.44±0.02                    | 0.06±0.01              | 475 | 14.0±117.5                   | 104±848                | 3.05±820.48            | 0.05±961.03            | 452 |
|              | B   | 0.65±0.03                    | 0.10±0.01              | 473 | 0.88±0.12                    | 0.58±0.58              | 0.67±1.63              | 0.19±1.99              | 464 |
|              | C   | 0.55±0.02                    | 0.09±0.01              | 460 | 0.71±0.13                    | 0.48±0.97              | 0.76±3.17              | 0.23±3.61              | 457 |
|              | D   | 0.64±0.03                    | 0.11±0.01              | 479 | 3.13±3.18                    | 12.3±18.9              | 2.61±0.96              | 0.11±0.02              | 453 |
| Hypothalamus | A   | 0.40±0.03                    | 0.06±0.01              | 493 | 273*                         | 1355*                  | 1.65*                  | 0.05*                  | 459 |
|              | B   | 0.53±0.03                    | 0.09±0.01              | 478 | 1.17±0.88                    | 3.45±1.30              | 2.22±6.73              | 0.13±14.19             | 472 |
|              | C   | 0.50±0.02                    | 0.08±0.01              | 460 | 0.64±0.24                    | 0.63±1.60              | 1.37±2.85              | 0.27±0.20              | 462 |
|              | D   | 0.59±0.04                    | 0.12±0.02              | 489 | 680±116990                   | 3105±534810            | 2.16±0.48              | 0.09±0.01              | 453 |
| Cortex       | A   | 0.37±0.02                    | 0.06±0.01              | 468 | 1.68±0.46                    | 7.83±1.43              | 1.84±0.62              | 0.06±4.47              | 401 |
|              | B   | 0.47±0.02                    | 0.09±0.01              | 450 | 0.66±0.04                    | 0.64±0.21              | 0.72±0.24              | 0.16±0.02              | 416 |
|              | C   | 0.41±0.01                    | 0.07±0.002             | 417 | 0.43±0.12                    | 0.19±1.58              | 1.50±19.49             | 1.00±1.64              | 421 |
|              | D   | 0.47±0.02                    | 0.09±0.01              | 452 | 1.46±0.45                    | 6.65±0.77              | 2.62±1.18              | 0.11±6.33              | 403 |
| Brainstem    | A   | 0.63±0.04                    | 0.10±0.02              | 501 | 2.03±0.40                    | 3.53±1.32              | 1.05±0.19              | 0.10±0.01              | 451 |
|              | B   | 0.60±0.03                    | 0.11±0.01              | 475 | 0.96±0.11                    | 0.89±0.30              | 0.72±0.83              | 0.15±1.20              | 449 |
|              | C   | 0.68±0.02                    | 0.12±0.01              | 467 | 1.11±0.22                    | 1.19±0.59              | 1.10±1.86              | 0.21±2.66              | 452 |
|              | D   | 0.71±0.03                    | 0.13±0.01              | 479 | 4.75±5.87                    | 19.6±19.9              | 2.79±15.04             | 0.12±37.81             | 446 |
| Cerebellum   | A   | 0.57±0.04                    | 0.11±0.02              | 492 | 2.10±0.32                    | 4.90±1.30              | 1.23±0.13              | 0.10±0.005             | 420 |
|              | B   | 0.61±0.02                    | 0.13±0.01              | 461 | 0.81±0.05                    | 0.53±0.24              | 0.46±0.55              | 0.20±0.71              | 436 |
|              | C   | 0.62±0.01                    | 0.13±0.01              | 439 | 0.86±0.21                    | 1.13±1.45              | 1.84±1.78              | 0.34±0.12              | 433 |
|              | D   | 0.68±0.03                    | 0.16±0.02              | 473 | 48.7±819.7                   | 298±5152               | 3.55±1.05              | 0.13±0.03              | 438 |

(continued on the next page)

**Supplemental Table 4 (continuation).** 1TCM and 2TCM rate constant estimates of [<sup>18</sup>F]FET-AMC13 uptake in brain regions of control rats.

| ROI                | Rat | 1TCM                         |                        |     | 2TCM                         |                        |                        |                        |     |
|--------------------|-----|------------------------------|------------------------|-----|------------------------------|------------------------|------------------------|------------------------|-----|
|                    |     | K <sub>1</sub><br>(ml/g/min) | k <sub>2</sub> (1/min) | AIC | K <sub>1</sub><br>(ml/g/min) | k <sub>2</sub> (1/min) | k <sub>3</sub> (1/min) | k <sub>4</sub> (1/min) | AIC |
| Olfactory<br>bulbs | A   | 0.55±0.05                    | 0.12±0.02              | 500 | 3.58±1.65                    | 9.75±3.75              | 1.20±2.96              | 0.09±7.03              | 449 |
|                    | B   | 0.49±0.02                    | 0.08±0.01              | 453 | 0.63±0.07                    | 0.47±0.34              | 0.69±0.56              | 0.20±0.04              | 444 |
|                    | C   | 0.44±0.01                    | 0.09±0.005             | 438 | 0.59±0.10                    | 0.68±0.93              | 1.07±3.21              | 0.23±3.75              | 431 |
|                    | D   | 0.50±0.03                    | 0.10±0.01              | 479 | 1.08±0.20                    | 1.82±0.90              | 0.92±0.31              | 0.11±0.01              | 452 |
| Pituitary          | A   | 0.52±0.05                    | 0.08±0.02              | 510 | 6.16±6.57                    | 16.8±16.5              | 1.11±15.04             | 0.06±22.82             | 472 |
|                    | B   | 0.63±0.04                    | 0.10±0.01              | 490 | 1.23±0.31                    | 1.62±0.42              | 0.99±1.42              | 0.12±2.70              | 474 |
|                    | C   | 0.52±0.02                    | 0.08±0.01              | 472 | 0.97±0.34                    | 1.54±0.73              | 1.23±2.61              | 0.13±4.28              | 464 |
|                    | D   | 0.67±0.05                    | 0.12±0.02              | 497 | 1.38±0.24                    | 1.48±0.20              | 0.69±0.58              | 0.11±1.34              | 473 |

Data are presented as means±SD.\* Standard deviation could not be estimated



**Supplemental Table 5.**  $V_T$  of [ $^{18}\text{F}$ ]FET-AMC13 per brain region in control and raclopride-treated rats.

| Region of interest | Logan $V_T$    |               | 1TCM $V_T$     |                | 2TCM $V_T$     |                |
|--------------------|----------------|---------------|----------------|----------------|----------------|----------------|
|                    | control        | raclopride    | control        | raclopride     | control        | raclopride     |
| Striatum           | 7.72±0.84 (11) | 6.97±0.32 (5) | 7.60±0.64 (8)  | 6.69±0.41 (6)  | 7.90±0.84 (11) | 6.97±0.39 (6)  |
| Hippocampus        | 6.49±0.88 (14) | 6.25±0.56 (9) | 6.34±0.71 (11) | 5.88±0.56 (10) | 6.62±0.86 (13) | 6.27±0.63 (10) |
| Thalamus           | 6.64±0.61 (9)  | 6.40±0.40 (6) | 6.45±0.62 (10) | 5.93±0.71 (12) | 6.75±0.62 (9)  | 6.44±0.60 (9)  |
| Hypothalamus       | 6.10±0.44 (7)  | 5.76±0.26 (5) | 5.86±0.60 (10) | 5.38±0.38 (7)  | 6.20±0.55 (9)  | 5.83±0.34 (6)  |
| Cortex             | 5.69±0.49 (9)  | 5.42±0.44 (8) | 5.53±0.38 (7)  | 5.17±0.60 (12) | 5.75±0.45 (8)  | 5.45±0.52 (10) |
| Brainstem          | 6.12±0.57 (9)  | 5.53±0.26 (5) | 5.67±0.33 (6)  | 4.99±0.56 (11) | 6.17±0.52 (8)  | 5.46±0.36 (7)  |
| Cerebellum         | 5.06±0.53 (11) | 4.99±0.30 (6) | 4.68±0.34 (7)  | 4.43±0.40 (9)  | 5.08±0.49 (10) | 4.96±0.44 (9)  |
| Olfactory Bulbs    | 5.64±0.57 (10) | 5.14±0.43 (8) | 4.99±0.62 (12) | 4.36±0.55 (13) | 5.45±0.52 (10) | 5.02±0.61 (12) |
| Pituitary          | 7.15±0.49 (7)  | 6.53±0.44 (7) | 6.16±0.35 (6)  | 5.33±0.88 (17) | 6.89±0.32 (5)  | 6.34±0.82 (13) |

Data are presented as means±SD, n=4 for the control group, n=3 for the raclopride-treated group. Coefficients of variation (in %) are shown in parentheses.

**Supplemental Table 6.** BP<sub>ND</sub> of [<sup>18</sup>F]FET-AMC13 per brain region in control and raclopride-treated rats.

| Region of interest | 1TCM BP <sub>ND</sub> |                    | 2TCM BP <sub>ND</sub> (V <sub>T</sub> -based) |                    | Logan BP <sub>ND</sub> |                    | SRTM BP <sub>ND</sub> |                    |
|--------------------|-----------------------|--------------------|-----------------------------------------------|--------------------|------------------------|--------------------|-----------------------|--------------------|
|                    | control               | raclopride         | control                                       | raclopride         | control                | raclopride         | control               | raclopride         |
| Striatum           | 0.63±0.08             | 0.51±0.06 (-18%)   | 0.56±0.05                                     | 0.41±0.05 (-27%)*  | 0.52±0.01              | 0.40±0.04 (-24%)*  | 0.51±0.02             | 0.38±0.05 (-26%)** |
| Hippocampus        | 0.35±0.11             | 0.33±0.09 (-8%)    | 0.30±0.07                                     | 0.26±0.06 (-13%)   | 0.28±0.04              | 0.25±0.05 (-10%)   | 0.26±0.04             | 0.23±0.05 (-13%)   |
| Thalamus           | 0.38±0.06             | 0.33±0.04 (-12%)   | 0.33±0.02                                     | 0.30±0.01 (-10%)*  | 0.31±0.02              | 0.28±0.005 (-10%)* | 0.28±0.06             | 0.26±0.02 (-7%)    |
| Hypothalamus       | 0.25±0.04             | 0.22±0.04 (-14%)   | 0.22±0.03                                     | 0.18±0.06 (-19%)   | 0.21±0.04              | 0.16±0.04 (-25%)   | 0.21±0.03             | 0.16±0.04 (-23%)   |
| Cortex             | 0.18±0.05             | 0.17±0.05 (-9%)    | 0.13±0.04                                     | 0.10±0.02 (-27%)   | 0.13±0.03              | 0.09±0.03 (-32%)   | 0.11±0.03             | 0.08±0.02 (-24%)   |
| Brainstem          | 0.21±0.03             | 0.13±0.03 (-41%)*  | 0.22±0.02                                     | 0.10±0.02 (-53%)** | 0.21±0.02              | 0.11±0.02 (-47%)** | 0.18±0.04             | 0.07±0.03 (-60%)** |
| Olfactory Bulbs    | 0.07±0.16             | -0.02±0.03 (-127%) | 0.08±0.13                                     | 0.01±0.04 (-88%)   | 0.12±0.12              | 0.03±0.03 (-74%)   | 0.10±0.13             | 0.11±0.05 (+10%)   |
| Pituitary          | 0.32±0.05             | 0.18±0.05 (-38%)   | 0.36±0.07                                     | 0.13±0.04 (-23%)   | 0.42±0.05              | 0.13±0.03 (-26%)   | 0.71±0.32             | 0.55±0.53 (-22%)   |

Data are presented as means±SD, n=4 for the control group, n=3 for the raclopride-treated group (except for the SRTM BP<sub>ND</sub> values, where n=4).

Next to the BP<sub>ND</sub> values of the raclopride-treated group, percentage of change relative to the control group is shown. \* P < 0.05, \*\* P < 0.01, 2-sided

Welch test

## LITERATURE CITED

1. Innis RB, Cunningham VJ, Delforge J, et al. Consensus nomenclature for in vivo imaging of reversibly binding radioligands. *J Cereb Blood Flow Metab.* 2007;27(9):1533–9.
2. Cunningham VJ, Rabiner EA, Slifstein M, Laruelle M, Gunn RN. Measuring drug occupancy in the absence of a reference region: the Lassen plot re-visited. *J Cereb Blood Flow & Metab.* 2009;30(1):46–50.
